# Supplementary material for: The Association of the Consumption Time for Different Food with the Cardiovascular Disease and All-Cause Mortality Among Diabetes Patients
Source: Research Square preprint supplement (doi:10.21203/rs.3.rs-876102/v1), 2021-09-27
Supplement: Supplementary file 1 [file 8922902d88fab15c6d627705.docx]

Supplementary Table A-adjusted HRs for the other food groups consumed in the forenoon and CVD-mortality and all-cause mortality

|  | CVD mortality | | All-cause mortality | |
| --- | --- | --- | --- | --- |
|  | Case/N | HR (95%CI) | Case/N | HR (95%CI) |
| Whole grain (Tertiles) |  |  |  |  |
| Q1 | 149/2282 | 1 | 414/2282 | 1 |
| Q2 | 63/1121 | 0.67(0.50-0.92) | 197/1121 | 0.78(0.66-0.93) |
| Q3 | 102/1296 | 0.91(0.64-1.29) | 302/1296 | 1.05(0.85-1.29) |
| P for trend |  | 0.232 |  | 0.895 |
| Red and orange vegetable (Yes/No) |  |  |  |  |
| No | 289/3982 | 1 | 836/3982 | 1 |
| Yes | 25/717 | 0.80(0.52-1.25) | 77/717 | 0.81(0.63-1.04) |
| P for trend |  | 0.328 |  | 0.098 |
| Tomato (Yes/No) |  |  |  |  |
| No | 287/4004 | 1 | 825/4004 | 1 |
| Yes | 27/695 | 0.69(0.45-1.06) | 88/695 | 0.79(0.62-1.01) |
| P for trend |  | 0.090 |  | 0.055 |
| Furit (Yes/No) |  |  |  |  |
| No | 238/3752 | 1 | 702/3752 | 1 |
| Yes | 76/947 | 0.90(0.67-1.19) | 211/947 | 0.85(0.72-1.00) |
| P for trend |  | 0.456 |  | 0.055 |
| Milk (Quartiles) |  |  |  |  |
| Q1 | 87/1161 | 1 | 218/1161 | 1 |
| Q2 | 54/1114 | 0.69(0.49-0.97) | 192/1114 | 0.94(0.77-1.14) |
| Q3 | 86/1225 | 0.81(0.60-1.11) | 234/1225 | 0.86(0.71-1.04) |
| Q4 | 78/1074 | 0.76(0.53-1.10) | 242/1074 | 1.07(0.86-1.33) |
| P for trend |  | 0.183 |  | 0.970 |
| Yogurt (Yes/No) |  |  |  |  |
| No | 310/4529 | 1 | 895/4529 | 1 |
| Yes | 4/170 | 0.44(0.16-1.23) | 181/17 | 0.72(0.44-1.18) |
| P for trend |  | 0.118 |  | 0.189 |
| Cheese (Yes/No) |  |  |  |  |
| No | 286/3838 | 1 | 817/3838 | 1 |
| Yes | 28/861 | 0.74(0.49-1.12) | 96/861 | 0.791(0.633-0.989) |
| P for trend |  | 0.153 | 0.039 |  |
| Red meat (Yes/No) |  |  |  |  |
| No | 286/4282 | 1 | 841/4282 | 1 |
| Yes | 28/417 | 0.95(0.63-1.43) | 72/417 | 0.91(0.71-1.17) |
| P for trend |  | 0.808 |  | 0.476 |
| Poultry (Yes/No) |  |  |  |  |
| No | 305/4439 | 1 | 889/4439 | 1 |
| Yes | 9/260 | 0.90(0.45-1.81) | 24/260 | 0.78(0.51-1.20) |
| P for trend |  | 0.775 |  | 0.261 |
| Eggs (Tertiles) |  |  |  |  |
| Q1 | 185/2433 | 1 | 506/2433 | 1 |
| Q2 | 29/636 | 0.71(0.48-1.06) | 78/636 | 0.65(0.51-0.83) |
| Q3 | 100/1630 | 0.78(0.56-1.10) | 329/1630 | 0.89(0.74-1.08) |
| P for trend |  | 0.087 |  | 0.063 |
| Soy (Yes/No) |  |  |  |  |
| No | 301/4513 | 1 | 881/4513 | 1 |
| Yes | 13/186 | 1.22(0.68-2.20) | 32/186 | 0.95(0.79-1.38) |
| P for trend |  | 0.502 |  | 0.793 |
| Seafood (Yes/No) |  |  |  |  |
| No | 311/4583 | 1 | 899/4583 | 1 |
| Yes | 3/116 | 0.42(0.13-1.33) | 14/116 | 0.85(0.49-1.46) |
| P for trend |  | 0.138 |  | 0.548 |
| Legumes (Yes/No) |  |  |  |  |
| No | 305/4441 | 1 | 877/4441 | 1 |
| Yes | 9/258 | 0.73(0.36-1.50) | 36/258 | 1.12(0.78-1.62) |
| P for trend |  | 0.396 |  | 0.531 |

Data are HRs and (95%CI), and confounders included age, sex, ethnics, education, income, smoking, drinking, regular exercise habits, BMI, total intake of daily energy, fat, carbohydrate, protein, family history of diabetes, hypertension and dyslipidemia, and medication, total intake of specific food group in a day. Case/N, mortality number/total number.

Supplementary Table B-adjusted HRs for the other food groups consumed in the afternoon and CVD-mortality and all-cause mortality

|  | CVD mortality | | All-cause mortality | |
| --- | --- | --- | --- | --- |
|  | Case/N | HR (95%CI) | Case/N | HR (95%CI) |
| Whole grain (Yes/No) |  |  |  |  |
| No | 230/3287 | 1 | 663/3287 | 1 |
| Yes | 84/1412 | 0.79(0.61-1.04) | 250/1412 | 0.85(0.72-0.99) |
| P for trend |  | 0.087 |  | 0.033 |
| Refined grain (Quartiles) |  |  |  |  |
| Q1 | 75/983 | 1 | 215/983 | 1 |
| Q2 | 90/1217 | 0.89(0.65-1.22) | 259/1217 | 0.85(0.71-1.02) |
| Q3 | 95/1362 | 0.95(0.69-1.30) | 271/1362 | 0.87(0.72-1.04) |
| Q4 | 54/1137 | 0.96(0.64-1.43) | 168/1137 | 0.89(0.71-1.12) |
| P for trend |  | 0.876 |  | 0.296 |
| Dark vegetable (Yes/No) |  |  |  |  |
| No | 274/4047 | 1 | 803/4047 | 1 |
| Yes | 40/652 | 1.26(0.87-1.83) | 110/652 | 1.20(0.96-1.50) |
| P for trend |  | 0.227 |  | 0.116 |
| Red and orange vegetable (Tertiles) |  |  |  |  |
| Q1 | 193/2358 | 1 | 557/2358 | 1 |
| Q2 | 23/334 | 1.09(0.70-1.69) | 58/334 | 0.92(0.70-1.21) |
| Q3 | 98/2007 | 1.08(0.82-1.43) | 298/2007 | 1.02(0.87-1.20) |
| P for trend |  | 0.214 |  | 0.825 |
| Potato (Yes/No) |  |  |  |  |
| No | 223/3228 | 1 | 640/3228 | 1 |
| Yes | 91/1471 | 0.91(0.70-1.18) | 273/1471 | 0.94(0.81-1.10) |
| P for trend |  | 0.495 |  | 0.449 |
| Starchy vegetable (Yes/No) |  |  |  |  |
| No | 228/3115 | 1 | 655/3115 | 1 |
| Yes | 86/1584 | 0.94(0.72-1.22) | 258/1584 | 0.94(0.80-1.09) |
| P for trend |  | 0.627 |  | 0.405 |
| Tomato (Tertiles) |  |  |  |  |
| Q1 | 169/2425 | 1 | 515/2425 | 1 |
| Q2 | 63/790 | 1.36(1.01-1.83) | 149/790 | 1.04(0.86-1.25) |
| Q3 | 82/1484 | 1.08(0.80-1.45) | 249/1484 | 1.03(0.87-1.22) |
| P for trend |  | 0.386 |  | 0.709 |
| Fruit (Yes/No) |  |  |  |  |
| No | 248/3884 | 1 | 738/3884 | 1 |
| Yes | 66/815 | 1.13(0.84-1.52) | 175/815 | 1.01(0.84-1.21) |
| P for trend |  | 0.429 |  | 0.900 |
| Milk (Tertiles) |  |  |  |  |
| Q1 | 170/2635 | 1 | 484/2635 | 1 |
| Q2 | 21/276 | 1.12(0.71-1.77) | 51/276 | 0.92(0.69-1.23) |
| Q3 | 123/1788 | 0.93(0.73-1.20) | 378/1788 | 0.98(0.85-1.13) |
| P for trend |  | 0.605 |  | 0.769 |
| Yogurt (Yes/No) |  |  |  |  |
| No | 303/4511 | 1 | 886/4511 | 1 |
| Yes | 11/188 | 1.48(0.71-3.07) | 27/188 | 1.13(0.72-1.77) |
| P for trend |  | 0.295 |  | 0.589 |
| Cheese (Tertiles) |  |  |  |  |
| Q1 | 208/2868 | 1 | 605/2868 | 1 |
| Q2 | 42/554 | 1.13(0.81-1.58) | 102/554 | 0.87(0.70-1.08) |
| Q3 | 64/1277 | 1.11(0.80-1.55) | 206/1277 | 1.01(0.84-1.21) |
| P for trend |  | 0.444 |  | 0.859 |
| Red meat (Tertiles) |  |  |  |  |
| Q1 | 210/3198 | 1 | 623/3198 | 1 |
| Q2 | 25/293 | 1.10(0.72-1.68) | 64/293 | 0.99(0.76-1.28) |
| Q3 | 79/1208 | 1.04(0.78-1.39) | 226/1208 | 1.00(0.85-1.19) |
| P for trend |  | 0.724 |  | 0.992 |
| Poultry (Tertiles) |  |  |  |  |
| Q1 | 241/3317 | 1 | 685/3317 | 1 |
| Q2 | 11/173 | 0.88(0.48-1.63) | 34/173 | 0.96(0.68-1.36) |
| Q3 | 62/1209 | 0.94(0.68-1.31) | 194/1209 | 1.05(0.87-1.26) |
| P for trend |  | 0.684 |  | 0.659 |
| Eggs (Tertiles) |  |  |  |  |
| Q1 | 176/2571 | 1 | 509/2571 | 1 |
| Q2 | 31/461 | 0.97(0.66-1.44) | 81/461 | 0.81(0.64-1.03) |
| Q3 | 107/1667 | 0.99(0.77-1.26) | 323/1667 | 0.92(0.80-1.07) |
| P for trend |  | 0.902 |  | 0.245 |
| Soy (Yes/No) |  |  |  |  |
| No | 281/4362 | 1 | 828/4362 | 1 |
| Yes | 33/337 | 1.42(0.98-2.08) | 85/337 | 1.27(1.01-1.60) |
| P for trend |  | 0.067 |  | 0.045 |
| Seafood (Yes/No) |  |  |  |  |
| No | 266/4017 | 1 | 796/4017 | 1 |
| Yes | 48/682 | 1.10(0.78-1.56) | 117/682 | 0.92(0.74-1.13) |
| P for trend |  | 0.580 |  | 0.417 |
| Processed meat (Quartiles) |  |  |  |  |
| Q1 | 77/1205 | 1 | 247/1205 | 1 |
| Q2 | 84/1066 | 1.31(0.95-1.79) | 236/1066 | 1.10(0.92-1.32) |
| Q3 | 87/1265 | 1.13(0.82-1.54) | 254/1265 | 1.00(0.84-1.20) |
| Q4 | 66/1163 | 1.19(0.82-1.73) | 176/1163 | 0.99(0.79-1.23) |
| P for trend |  | 0.451 |  | 0.823 |
| Legumes (Yes/No) |  |  |  |  |
| No | 274/4046 | 1 | 811/4046 | 1 |
| Yes | 40/653 | 1.03(0.71-1.49) | 102/623 | 0.87(0.69-1.09) |
| P for trend |  | 0.887 |  | 0.216 |

Data are HRs and (95%CI), and confounders included age, sex, ethnics, education, income, smoking, drinking, regular exercise habits, BMI, total intake of daily energy, fat, carbohydrate, protein, family history of diabetes, hypertension and dyslipidemia, and medication, total intake of specific food group in a day. Case/N, mortality number/total number.

Supplementary Table C-adjusted HRs for the other food groups consumed in the evening and CVD-mortality and all-cause mortality

|  | CVD mortality | | All-cause mortality | |
| --- | --- | --- | --- | --- |
|  | Case/N | HR (95%CI) | Case/N | HR (95%CI) |
| Whole grain (Tertiles) |  |  |  |  |
| Q1 | 204/3110 | 1 | 600/3110 | 1 |
| Q2 | 29/338 | 0.86(0.58-1.27) | 85/338 | 0.88(0.70-1.11) |
| Q3 | 81/1251 | 1.01(0.76-1.35) | 228/1251 | 1.01(0.85-1.20) |
| P for trend |  | 0.949 |  | 0.944 |
| Red and orange vegetable (Quartiles) |  |  |  |  |
| Q1 | 150/1647 | 1 | 410/1647 | 1 |
| Q2 | 12/152 | 1.15(0.63-2.10) | 31/152 | 1.02(0.70-1.48) |
| Q3 | 73/1469 | 0.78(0.58-1.05) | 242/1469 | 0.86(0.73-1.01) |
| Q4 | 79/1431 | 1.10(0.75-1.60) | 230/1431 | 0.89(0.72-1.11) |
| P for trend |  | 0.609 |  | 0.110 |
| Tomato (Quartiles) |  |  |  |  |
| Q1 | 150/1804 | 1 | 400/1804 | 1 |
| Q2 | 8/129 | 0.87(0.42-1.78) | 22/129 | 0.93(0.60-1.43) |
| Q3 | 84/1458 | 0.80(0.60-1.05) | 262/1458 | 0.90(0.77-1.06) |
| Q4 | 72/1308 | 0.79(0.55-1.13) | 229/1308 | 0.90(0.73-1.10) |
| P for trend |  | 0.082 |  | 0.179 |
| Fruit (Yes/No) |  |  |  |  |
| No | 238/3751 | 1 | 696/3751 | 1 |
| Yes | 76/948 | 1.12(0.83-1.49) | 217/948 | 1.09(0.92-1.30) |
| P for trend |  | 0.460 |  | 0.318 |
| Milk (Quartiles) |  |  |  |  |
| Q1 | 100/1523 | 1 | 274/1523 | 1 |
| Q2 | 28/399 | 1.07(0.70-1.64) | 80/399 | 1.08(0.83-1.39) |
| Q3 | 103/1630 | 0.85(0.64-1.14) | 331/1630 | 0.95(0.80-1.12) |
| Q4 | 83/1147 | 0.85(0.60-1.22) | 228/1147 | 0.84(0.68-1.04) |
| P for trend |  | 0.241 |  | 0.120 |
| Yogurt (Yes/No) |  |  |  |  |
| No | 304/4499 | 1 | 879/4499 | 1 |
| Yes | 10/200 | 0.76(0.36-1.60) | 34/200 | 0.97(0.64-1.49) |
| P for trend |  | 0.465 |  | 0.898 |
| Cheese (Tertiles) |  |  |  |  |
| Q1 | 196/2533 | 1 | 541/2533 | 1 |
| Q2 | 24/439 | 0.83(0.55-1.25) | 91/439 | 0.93(0.74-1.17) |
| Q3 | 91/1727 | 1.028(0.76-1.39) | 281/1727 | 0.95(0.80-1.13) |
| P for trend |  | 0.996 |  | 0.526 |
| Red meat (Quartiles) |  |  |  |  |
| Q1 | 144/2164 | 1 | 407/2164 | 1 |
| Q2 | 4/102 | 0.39(0.15-1.07) | 20/102 | 0.69(0.44-1.09) |
| Q3 | 81/1199 | 0.91(0.69-1.22) | 229/1199 | 0.89(0.745-1.05) |
| Q4 | 85/1234 | 0.90(0.64-1.27) | 257/1234 | 0.96(0.78-1.18) |
| P for trend |  | 0.488 |  | 0.377 |
| Poultry (Tertiles) |  |  |  |  |
| Q1 | 193/2709 | 1 | 569/2709 | 1 |
| Q2 | 29/359 | 1.40(0.93-2.10) | 78/359 | 1.20(0.94-1.53) |
| Q3 | 92/1631 | 1.00(0.73-1.38) | 266/1631 | 0.92(0.77-1.12) |
| P for trend |  | 0.822 |  | 0.561 |
| Eggs (Tertiles) |  |  |  |  |
| Q1 | 148/2046 | 1 | 408/2046 | 1 |
| Q2 | 46/660 | 0.97(0.69-1.36) | 136/660 | 1.00(0.82-1.22) |
| Q3 | 120/1993 | 0.91(0.70-1.17) | 369/1993 | 0.89(0.76-1.03) |
| P for trend |  | 0.455 |  | 0.115 |
| Soy (Yes/No) |  |  |  |  |
| No | 274/4241 | 1 | 795/4241 | 1 |
| Yes | 40/458 | 1.01(0.71-1.44) | 118/458 | 1.00(0.81-1.24) |
| P for trend |  | 0.971 |  | 0.980 |
| Seafood (Yes/No) |  |  |  |  |
| No | 259/3804 | 1 | 769/3804 | 1 |
| Yes | 55/895 | 0.90(0.64-1.28) | 144/895 | 0.84(0.68-1.04) |
| P for trend |  | 0.555 |  | 0.117 |
| Legumes (Yes/No) |  |  |  |  |
| No | 262/3756 | 1 | 755/3756 | 1 |
| Yes | 52/943 | 0.84(0.59-1.19) | 158/943 | 0.89(0.73-1.09) |
| P for trend |  | 0.324 |  | 0.267 |

Data are HRs and (95%CI), and confounders included age, sex, ethnics, education, income, smoking, drinking, regular exercise habits, BMI, total intake of daily energy, fat, carbohydrate, protein, family history of diabetes, hypertension and dyslipidemia, and medication, total intake of specific food group in a day. Case/N, mortality number/total number.

Supplementary Table D-adjusted HRs for the refined grain, dark vegetable, potato, starchy vegetable and processed meat consumed in the forenoon and evening and CVD-mortality and all-cause mortality after excluding the participants who died within two years of follow-up or had follow-up duration of less than two years

|  | CVD mortality | | All-cause mortality | |
| --- | --- | --- | --- | --- |
|  | Case/N | HR (95%CI) | Case/N | HR (95%CI) |
| **In the forenoon** |  |  |  |  |
| Refined grain (Quartiles) |  |  |  |  |
| Q1 | 58/832 | 1 | 156/832 | 1 |
| Q2 | 67/1101 | 0.64(0.44-0.92) | 204/1101 | 0.76(0.61-0.94) |
| Q3 | 76/1205 | 0.73(0.51-1.05) | 244/1205 | 0.88(0.71-1.09) |
| Q4 | 45/1003 | 0.79(0.51-1.24) | 123/1003 | 0.75(0.57-0.97) |
| P for trend |  | 0.346 |  | 0.123 |
| Dark vegetable (Yes/No) |  |  |  |  |
| No | 242/4015 | 1 | 712/4015 | 1 |
| Yes | 4/126 | 0.71(0.26-1.97) | 15/126 | 1.02(0.60-1.73) |
| P for trend |  | 0.513 |  | 0.939 |
| Potato (Yes/No) |  |  |  |  |
| No | 231/3668 | 1 | 661/3668 | 1 |
| Yes | 15/473 | 0.56(0.32-0.97) | 66/473 | 0.92(0.70-1.20) |
| P for trend |  | 0.038 |  | 0.520 |
| Starchy vegetable |  |  |  |  |
| No | 234/3659 | 1 | 676/3659 | 1 |
| Yes | 12/482 | 0.57(0.31-1.03) | 51/482 | 0.87(0.65-1.18) |
| P for trend |  | 0.063 |  | 0.374 |
| Processed Meat (Tertiles) |  |  |  |  |
| T1 | 162/2441 | 1 | 484/2441 | 1 |
| T2 | 39/560 | 1.06(0.74-1.52) | 96/560 | 0.87(0.69-1.09) |
| T3 | 45/1140 | 0.72(0.50-1.03) | 147/1140 | 0.83(0.67-1.01) |
| P for trend |  | 0.105 |  | 0.047 |
| **In the evening** |  |  |  |  |
| Refined grain (Quartiles) |  |  |  |  |
| Q1 | 53/890 | 1 | 158/890 | 1 |
| Q2 | 70/1184 | 1.23(0.85-1.78) | 215/1184 | 1.16(0.94-1.44) |
| Q3 | 80/1123 | 1.64(1.00-2.67) | 213/1123 | 1.28(1.03-1.61) |
| Q4 | 43/944 | 1.72(1.17-2.53) | 141/944 | 1.37(1.04-1.81) |
| P for trend |  | 0.010 |  | 0.016 |
| Dark vegetable (Yes/No) |  |  |  |  |
| No | 209/3213 | 1 | 594/3213 | 1 |
| Yes | 37/928 | 0.59(0.39-0.90) | 133/928 | 0.80(0.63-1.00) |
| P for trend |  | 0.013 |  | 0.052 |
| Potato (Tertiles) |  |  |  |  |
| T1 | 134/2357 | 1 | 399/2357 | 1 |
| T2 | 44/669 | 1.05(0.74-1.50) | 132/669 | 1.00(0.82-1.23) |
| T3 | 68/1115 | 0.98(0.66-1.44) | 196/1115 | 0.82(0.65-1.02) |
| P for trend |  | 0.972 |  | 0.116 |
| Starchy vegetable(Tertiles) |  |  |  |  |
| T1 | 136/2110 | 1 | 393/2110 | 1 |
| T2 | 42/868 | 0.81(0.57-1.16) | 150/868 | 0.95(0.78-1.15) |
| T3 | 68/1163 | 1.05(0.71-1.56) | 184/1163 | 0.86(0.68-1.09) |
| P for trend |  | 0.906 |  | 0.211 |
| Processed meat (Quartiles) |  |  |  |  |
| Q1 | 54/918 | 1 | 166/918 | 1 |
| Q2 | 60/1103 | 1.04(0.71-1.51) | 202/1103 | 1.06(0.86-1.31) |
| Q3 | 62/1115 | 1.18(0.79-1.76) | 179/1115 | 1.05(0.83-1.32) |
| Q4 | 70/1005 | 2.03(1.28-3.22) | 180/1005 | 1.51(1.15-1.99) |
| P for trend |  | 0.005 |  | 0.015 |

Data are HRs and (95%CI), and confounders included age, sex, ethnics, education, income, smoking, drinking, regular exercise habits, BMI, total intake of daily energy, fat, carbohydrate, protein, family history of diabetes, hypertension and dyslipidemia, and medication, total intake of specific food group in a day. Case/N, mortality number/total number.

Supplementary Table E-adjusted HRs for the refined grain, dark vegetable, potato, starchy vegetable and processed meat consumed in the forenoon and evening and CVD-mortality and all-cause mortality after additionally adjusted for the confounder of overall dietary quality

|  | CVD mortality | | All-cause mortality | |
| --- | --- | --- | --- | --- |
|  | Case/N | HR (95%CI) | Case/N | HR (95%CI) |
| **In the forenoon** |  |  |  |  |
| Refined grain (Quartiles) |  |  |  |  |
| Q1 | 79/990 | 1 | 206/990 | 1 |
| Q2 | 90/1263 | 0.68(0.50-0.92) | 268/1263 | 0.79(0.66-0.95) |
| Q3 | 94/1351 | 0.72(0.52-0.99) | 287/1351 | 0.82(0.68-0.99) |
| Q4 | 51/1095 | 0.70(0.47-1.05) | 152/1095 | 0.72(0.57-0.91) |
| P for trend |  | 0.080 |  | 0.015 |
| Dark vegetable (Yes/No) |  |  |  |  |
| No | 309/4562 | 1 | 895/4562 | 1 |
| Yes | 5/137 | 0.68(0.27-1.68) | 18/137 | 0.96(0.59-1.55) |
| P for trend |  | 0.404 |  | 0.866 |
| Potato (Yes/No) |  |  |  |  |
| No | 297/4186 | 1 | 836/4186 | 1 |
| Yes | 17/513 | 0.53(0.16-0.87) | 77/513 | 0.89(0.69-1.14) |
| P for trend |  | 0.013 |  | 0.342 |
| Starchy vegetable |  |  |  |  |
| No | 301/4174 | 1 | 852/4174 | 1 |
| Yes | 13/525 | 0.51(0.29-0.90) | 61/525 | 0.84(0.64-1.10) |
| P for trend |  | 0.020 |  | 0.210 |
| Processed Meat (Tertiles) |  |  |  |  |
| T1 | 212/2818 | 1 | 610/2818 | 1 |
| T2 | 42/616 | 0.89(0.64-1.26) | 110/616 | 0.82(0.67-1.01) |
| T3 | 60/1265 | 0.77(0.56-1.05) | 193/1265 | 0.88(0.74-1.05) |
| P for trend |  | 0.090 |  | 0.088 |
| **In the evening** |  |  |  |  |
| Refined grain (Quartiles) |  |  |  |  |
| Q1 | 73/1031 | 1 | 211/1031 | 1 |
| Q2 | 89/1334 | 1.09(0.79-1.50) | 270/1334 | 1.10(0.91-1.33) |
| Q3 | 51/1049 | 1.40(0.90-2.17) | 171/1049 | 1.22(1.00-1.48) |
| Q4 | 101/1285 | 1.54(1.10-2.15) | 261/1285 | 1.33(1.03-1.70) |
| P for trend |  | 0.023 |  | 0.017 |
| Dark vegetable (Yes/No) |  |  |  |  |
| No | 263/3653 | 1 | 746/3653 | 1 |
| Yes | 51/1046 | 0.64(0.45-0.91) | 167/1046 | 0.82(0.67-1.01) |
| P for trend |  | 0.014 |  | 0.061 |
| Potato (Tertiles) |  |  |  |  |
| T1 | 176/2664 | 1 | 502/2664 | 1 |
| T2 | 49/750 | 0.87(0.63-1.20) | 161/750 | 0.98(0.82-1.18) |
| T3 | 89/1285 | 0.88(0.63-1.24) | 250/1285 | 0.87(0.71-1.06) |
| P for trend |  | 0.392 |  | 0.201 |
| Starchy vegetable(Tertiles) |  |  |  |  |
| T1 | 176/2380 | 1 | 491/2380 | 1 |
| T2 | 54/980 | 0.78(0.57-1.06) | 187/980 | 0.94(0.79-1.12) |
| T3 | 84/1339 | 0.953(0.67-1.35) | 235/1339 | 0.89(0.72-1.09) |
| P for trend |  | 0.489 |  | 0.234 |
| Processed meat (Quartiles) |  |  |  |  |
| Q1 | 67/1049 | 1 | 209/1049 | 1 |
| Q2 | 83/1258 | 1.14(0.82-1.59) | 262/1258 | 1.13(0.93-1.36) |
| Q3 | 81/1278 | 1.22(0.86-175) | 232/1278 | 1.11(0.90-1.37) |
| Q4 | 83/1114 | 1.84(1.21-2.80) | 210/1114 | 1.42(1.11-1.82) |
| P for trend |  | 0.008 |  | 0.018 |

Data are HRs and (95%CI), and confounders included age, sex, ethnics, education, income, smoking, drinking, regular exercise habits, BMI, total intake of daily energy, fat, carbohydrate, protein, family history of diabetes, hypertension and dyslipidemia, and medication, AHEI, total intake of specific food group in a day. Case/N, mortality number/total number.

Supplementary Table F-adjusted HRs for the refined grain, dark vegetable, potato, starchy vegetable and processed meat consumed in the forenoon and evening and CVD-mortality and all-cause mortality after additionally adjusted for breakfast skipping

|  | CVD mortality | | All-cause mortality | |
| --- | --- | --- | --- | --- |
|  | Case/N | HR (95%CI) | Case/N | HR (95%CI) |
| **In the forenoon** |  |  |  |  |
| Refined grain (Quartiles) |  |  |  |  |
| Q1 | 79/990 | 1 | 206/990 | 1 |
| Q2 | 90/1263 | 0.76(0.55-1.05) | 268/1263 | 0.84(0.69-1.02) |
| Q3 | 94/1351 | 0.81(0.58-1.13) | 287/1351 | 0.87(0.72-1.06) |
| Q4 | 51/1095 | 0.80(0.53-1.22) | 152/1095 | 0.78(0.61-1.00) |
| P for trend |  | 0.359 |  | 0.097 |
| Dark vegetable (Yes/No) |  |  |  |  |
| No | 309/4562 | 1 | 895/4562 | 1 |
| Yes | 5/137 | 0.78(0.28-1.74) | 18/137 | 0.97(0.60-1.57) |
| P for trend |  | 0.446 |  | 0.896 |
| Potato (Yes/No) |  |  |  |  |
| No | 297/4186 | 1 | 836/4186 | 1 |
| Yes | 17/513 | 0.55(0.33-0.92) | 77/513 | 0.91(0.71-1.17) |
| P for trend |  | 0.023 |  | 0.474 |
| Starchy vegetable |  |  |  |  |
| No | 301/4174 | 1 | 852/4174 | 1 |
| Yes | 13/525 | 0.53(0.30-0.95) | 61/525 | 0.86(0.65-1.13) |
| P for trend |  | 0.031 |  | 0.277 |
| Processed Meat (Tertiles) |  |  |  |  |
| T1 | 212/2818 | 1 | 610/2818 | 1 |
| T2 | 42/616 | 0.96(0.68-1.35) | 110/616 | 0.85(0.69-1.05) |
| T3 | 60/1265 | 0.83(0.61-1.15) | 193/1265 | 0.93(0.78-1.12) |
| P for trend |  | 0.273 |  | 0.305 |
| **In the evening** |  |  |  |  |
| Refined grain (Quartiles) |  |  |  |  |
| Q1 | 73/1031 | 1 | 211/1031 | 1 |
| Q2 | 89/1334 | 1.08(0.79-1.49) | 270/1334 | 1.08(0.89-1.30) |
| Q3 | 51/1049 | 1.37(0.88-2.12) | 171/1049 | 1.19(0.97-1.45) |
| Q4 | 101/1285 | 1.52(1.09-2.12) | 261/1285 | 1.27(0.99-1.63) |
| P for trend |  | 0.030 |  | 0.037 |
| Dark vegetable (Yes/No) |  |  |  |  |
| No | 263/3653 | 1 | 746/3653 | 1 |
| Yes | 51/1046 | 0.67(0.47-0.95) | 167/1046 | 0.83(0.68-1.02) |
| P for trend |  | 0.027 |  | 0.073 |
| Potato (Tertiles) |  |  |  |  |
| T1 | 176/2664 | 1 | 502/2664 | 1 |
| T2 | 49/750 | 0.88(0.64-1.22) | 161/750 | 0.99(0.82-1.19) |
| T3 | 89/1285 | 0.90(0.65-1.27) | 250/1285 | 0.87(0.71-1.06) |
| P for trend |  | 0.474 |  | 0.197 |
| Starchy vegetable(Tertiles) |  |  |  |  |
| T1 | 176/2380 | 1 | 491/2380 | 1 |
| T2 | 54/980 | 0.80(0.58-1.09) | 187/980 | 0.95(0.80-1.13) |
| T3 | 84/1339 | 0.98(0.69-1.39) | 235/1339 | 0.90(0.72-1.09) |
| P for trend |  | 0.589 |  | 0.248 |
| Processed meat (Quartiles) |  |  |  |  |
| Q1 | 67/1049 | 1 | 209/1049 | 1 |
| Q2 | 83/1258 | 1.16(0.83-1.62) | 262/1258 | 1.12(0.93-1.35) |
| Q3 | 81/1278 | 1.22(0.86-1.73) | 232/1278 | 1.07(0.88-1.32) |
| Q4 | 83/1114 | 1.82(1.20-2.74) | 210/1114 | 1.36(1.06-1.74) |
| P for trend |  | 0.010 |  | 0.045 |

Data are HRs and (95%CI), and confounders included age, sex, ethnics, education, income, smoking, drinking, regular exercise habits, BMI, total intake of daily energy, fat, carbohydrate, protein, family history of diabetes, hypertension and dyslipidemia, and medication, breakfast skipping, total intake of specific food group in a day. Case/N, mortality number/total number.

**Supplementary Figure**

SupplementaryFigure 1-Adjusted HR for CVD mortality after excluding the participants who died within two years of follow-up or had follow-up duration of less than two years: isocaloric substitution of refined grain, potato, starchy vegetable or processed and dark vegetable. Adjustments included age, sex, ethnics, education, income, smoking, drinking, regular exercise habits, BMI, total intake of daily energy, fat, carbohydrate, protein, family history of diabetes, hypertension and dyslipidemia, and medication, total intake of specific food group in a day. Case/N, mortality number/total number.


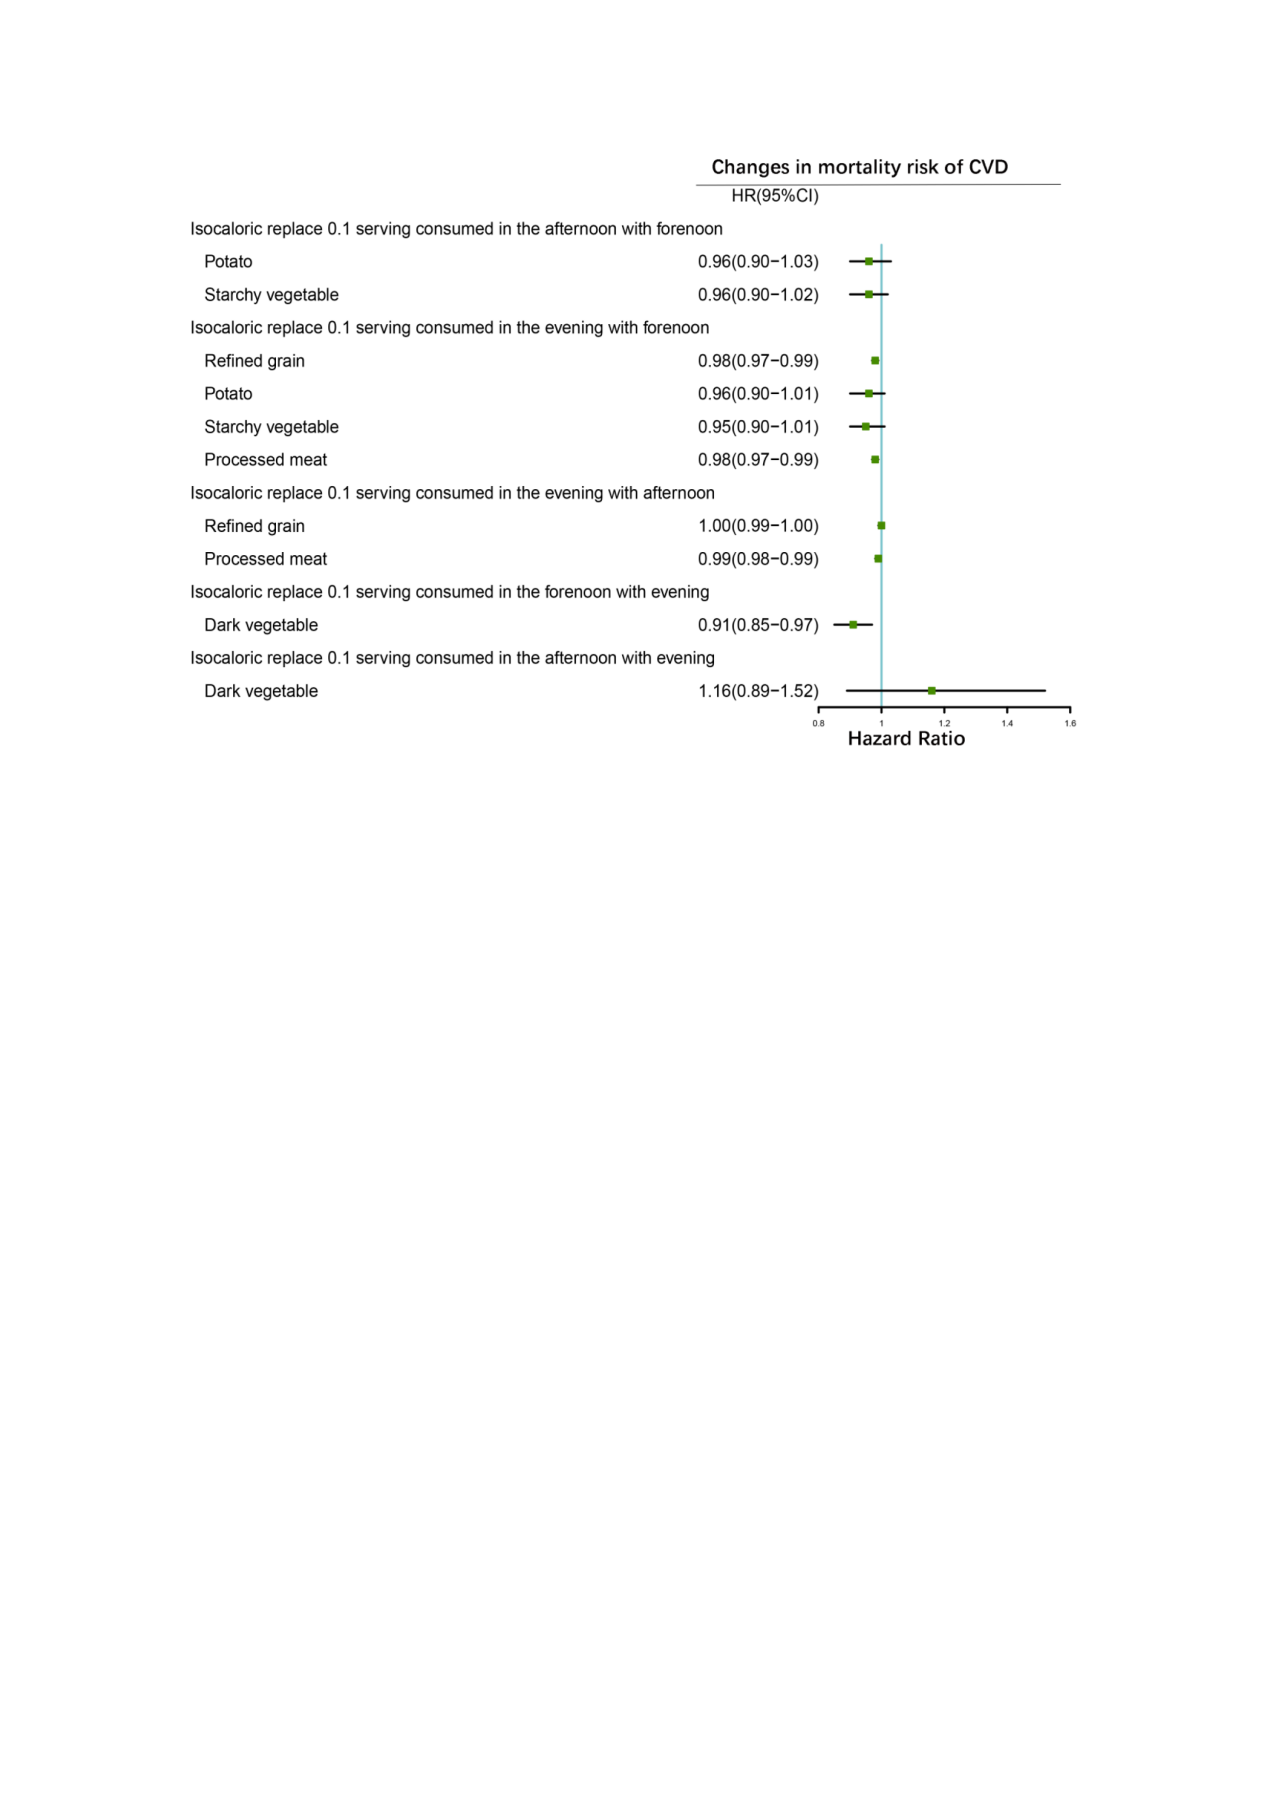


SupplementaryFigure 2-Adjusted HR for CVD mortality: isocaloric substitution of refined grain, potato, starchy vegetable or processed and dark vegetable. Adjustments included age, sex, ethnics, education, income, smoking, drinking, regular exercise habits, BMI, total intake of daily energy, fat, carbohydrate, protein, family history of diabetes, hypertension and dyslipidemia, and medication, AHEI, total intake of specific food group in a day. Case/N, mortality number/total number.


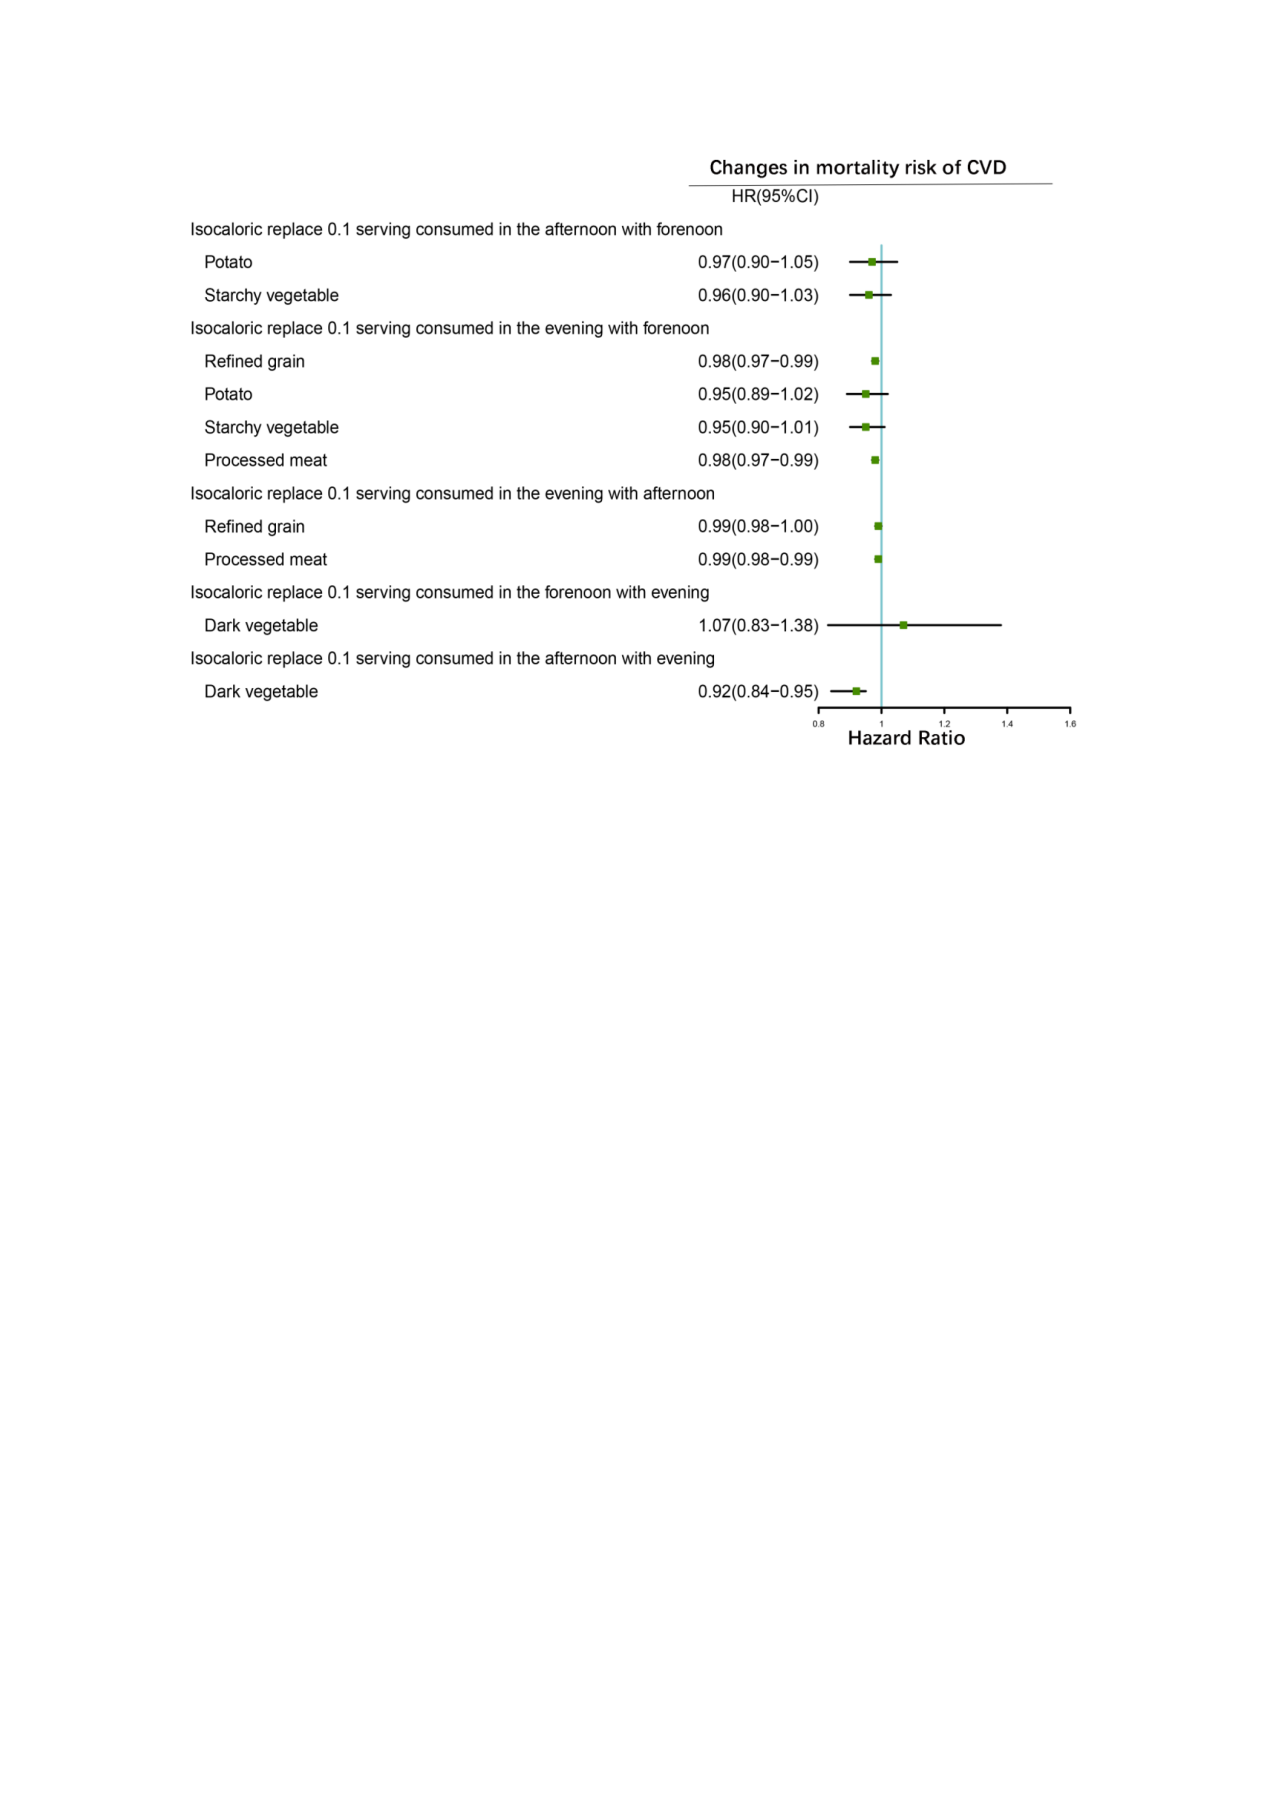


SupplementaryFigure 3-Adjusted HR for CVD mortality: isocaloric substitution of refined grain, potato, starchy vegetable or processed and dark vegetable. Adjustments included age, sex, ethnics, education, income, smoking, drinking, regular exercise habits, BMI, total intake of daily energy, fat, carbohydrate, protein, family history of diabetes, hypertension and dyslipidemia, and medication, breakfast skipping, total intake of specific food group in a day. Case/N, mortality number/total number.
